# Supplementary material
Source: publisher figshare collection journal article supplement (https://frontiersin.figshare.com/ndownloader/files/28240821)
Supplement: Supplementary file [file 28240821]

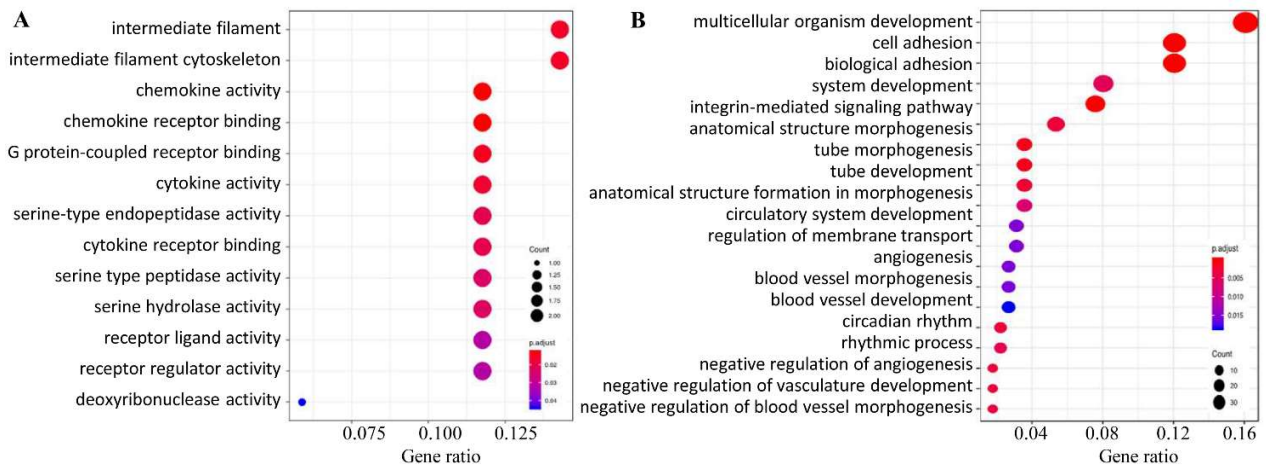

**Supplementary Figure 3.** Enriched gene ontology (GO) terms (hypergeometric test, Bonferroni-adjusted  $P < 0.05$ ) among the upregulated (**A**) and downregulated (**B**) differentially expressed genes in the biopsy distal to the lesion. The majority of the upregulated enriched terms are related to host and immune response and downregulated to organism developmental processes.
